# Supplementary material for: Identification of five genetic variants with differential effects on obesity-related traits based on age
Source: Front Genet. 2022 Oct 7;13:970657. doi: 10.3389/fgene.2022.970657 (PMC9585212; doi:10.3389/fgene.2022.970657)
Supplement: Supplementary file 1 [file Table1.XLSX]

## Sheet: Table S1
	Table S1. Association between age and obesity-related phenotypes
	Phenotype	BETA	SE	t value	P*
	BMI (kg/m2)	0.027	0.000996	27.06	< 2E-16
	BFP (%)	0.136	0.00134	101.7	< 2E-16
	WHR	0.00151	1.4e-05	107.3	< 2E-16
	WC (cm)	0.167	0.0025	66.54	< 2E-16
	HC (cm)	0.0166	0.00192	8.63	< 2E-16
	* Significance are derived using linear regression controlling sex.

## Sheet: Table S2
	Table S2. Suggestive SNPs with Pdiff < 1E-6 obtained by comparing Q1 and Q4.
	Phenotype	Chromosome	SNP	Position	Allele	Q1				Q4			Pdiff
						Beta	P	N		Beta	P	N
	BMI	2	rs6752506	137528204	G/A	0.1008	0.000162	88977		-0.07517	0.002188	85009	1.1376e-07
		2	rs35224733	71319965	T/C	-0.115	0.0005666	88977		0.08917	0.003549	85009	8.15621e-07
		3	rs182591686	115918000	A/G	0.3652	0.0006073	88977		-0.2838	0.003298	85009	8.06702e-07
		3	rs115531021	85322091	G/A	-0.3012	1.659e-05	88977		0.125	0.05267	85009	9.74664e-07
		4	rs149019706	40722604	T/C	-0.2484	0.005195	88977		0.3432	3.174e-05	85009	9.63569e-08
		4	rs187317434	168829491	A/G	-0.2723	0.000214	88977		0.1842	0.006073	85009	5.43e-07
		5	rs1496132	174840751	C/T	0.08724	0.01081	88977		-0.1235	9.415e-05	85009	7.71979e-07
		5	rs72811301	176312060	C/T	-0.2298	0.01081	88977		0.2116	0.001495	85009	8.75689e-07
		6	rs6904485	965163	C/T	-0.1038	0.0002643	88977		0.07081	0.006737	85009	7.80424e-07
		8	rs35224332	18760970	C/T	0.1068	0.0002839	88977		-0.08548	0.001666	85009	1.54598e-07
		8	rs118137404	118339293	A/G	0.3298	0.001823	88977		-0.3351	0.000504	85009	3.78414e-07
		8	rs11136252	145084493	C/T	-0.04598	0.04988	88977		0.1013	2.507e-06	85009	4.22747e-07
		11	rs12363906	87375119	G/A	0.156	1.822e-08	88977		-0.02562	0.3162	85009	1.39789e-07
		12	rs75636379	98966595	A/G	-0.3963	1.379e-05	88977		0.1571	0.05997	85009	9.92814e-07
		15	rs2305363	85452309	A/G	0.1103	3.555e-05	88977		-0.06123	0.01221	85009	2.17001e-07
		19	rs429358	45411941	C/T	-0.01913	0.5462	88977		-0.2246	2.317e-14	85009	2.08e-07
	BFP	1	rs12754595	89042485	T/C	0.08522	0.03917	87887		-0.1697	8.116e-06	83345	7.53092e-07
		2	rs75141810	137563774	T/C	0.1107	0.002001	87887		-0.1252	0.000174	83345	1.48752e-07
		4	rs73243012	22204325	G/C	0.2304	0.02872	87887		-0.4515	5.509e-06	83345	2.82884e-07
		5	rs1496132	174840751	C/T	0.1072	0.02084	87887		-0.1899	1.276e-05	83345	3.50868e-07
		6	rs2756293	965576	A/G	-0.1397	0.0002784	87887		0.1038	0.003788	83345	4.44082e-07
		7	rs801541	18672481	T/A	0.1108	0.0005187	87887		-0.09149	0.002085	83345	4.30416e-07
		12	rs116972051	28999680	A/G	-0.1968	0.01879	87887		0.3186	4.646e-05	83345	9.48933e-07
		12	rs117959401	41556731	A/G	0.4564	0.001815	87887		-0.464	0.0006278	83345	4.96433e-07
		13	rs77550846	42372685	A/G	0.2778	0.000696	87887		-0.2335	0.002274	83345	6.60791e-07
		17	rs56089409	63338360	A/C	-0.169	0.0006928	87887		0.1443	0.001955	83345	5.50269e-07
		21	rs762395	44769676	A/G	0.1359	4.963e-05	87887		-0.0693	0.02596	83345	9.99223e-07
		22	rs77096789	48959446	A/G	-0.2271	6.988e-05	87887		0.1468	0.005646	83345	1.70305e-07
	WHR	2	rs1922809	77687101	G/A	0.0009437	0.003041	89060		-0.00127	0.0001407	85152	3.10074e-07
		4	rs145500243	168845945	T/C	-0.002528	0.003947	89060		0.003595	6.831e-05	85152	2.15935e-07
		6	rs114947590	6623851	T/C	0.002558	0.0006206	89060		-0.002506	0.001371	85152	6.14269e-07
		6	rs62407575	28930387	A/G	0.003807	0.004048	89060		-0.005001	0.0002607	85152	8.32067e-07
		9	rs9409094	112488155	G/A	0.001837	8.534e-09	89060		-0.0004625	0.1657	85152	1.10623e-07
		11	rs113375609	35819102	C/T	0.004773	0.0005776	89060		-0.004592	0.001667	85152	7.17407e-07
		11	rs2126253	99107442	C/T	0.001344	0.005322	89060		-0.002217	1.334e-05	85152	6.22907e-08
		20	rs2746089	34646012	T/C	0.0009143	0.05749	89060		-0.002365	2.896e-06	85152	5.51108e-07
	WC	1	rs61766968	4807973	A/G	0.2491	3.705e-05	89076		-0.1496	0.01133	85157	3.56245e-07
		2	rs858938	50970292	G/T	0.3145	6.844e-06	89076		-0.1523	0.02642	85157	2.72243e-07
		3	rs9876006	8632480	T/C	-0.4075	0.001768	89076		0.4764	0.0002138	85157	1.92066e-07
		4	rs149019706	40722604	T/C	-0.6511	0.002665	89076		0.8284	0.0001174	85157	1.71621e-07
		4	rs72720369	141712614	G/C	1.289	1.944e-06	89076		-0.6058	0.02712	85157	1.13624e-07
		5	rs40655	9369151	T/C	-0.2429	0.0003744	89076		0.2167	0.001301	85157	2.34974e-07
		6	rs652888	31851234	G/A	0.3076	3.42e-06	89076		-0.1185	0.06942	85157	7.709e-07
		8	rs9100	145067467	T/A	-0.1609	0.004887	89076		0.2066	0.0002291	85157	7.40761e-07
		16	rs75753260	10009966	A/G	-0.4923	0.001949	89076		0.536	0.0005455	85157	5.80282e-07
		19	rs429358	45411941	C/T	-0.1037	0.1801	89076		-0.635	1.228e-16	85157	1.42455e-07
	HC	3	rs115704973	192869116	C/T	-0.3528	0.008423	89062		0.5162	4.29e-05	85156	3.33412e-07
		6	rs1749225	133213498	T/A	0.1252	0.00875	89062		-0.1752	0.0001214	85156	8.80215e-07
		7	rs73183297	71326888	A/G	-0.6064	0.0004832	89062		0.4888	0.002789	85156	7.06233e-07
		8	rs35692173	18750488	T/A	0.2124	0.0001806	89062		-0.1444	0.007956	85156	9.32403e-07
		8	rs6985603	145086428	C/G	-0.1334	0.002802	89062		0.1523	0.0003483	85156	5.56238e-07
		17	rs11078525	4533377	A/G	-0.1856	0.001356	89062		0.1764	0.001298	85156	9.37563e-07
		19	rs429358	45411941	C/T	0.09014	0.135	89062		-0.3191	3.935e-08	85156	1.27736e-07
		22	rs12169424	38316710	T/C	-0.2932	0.04208	89062		0.6394	2.806e-06	85156	3.86489e-07
	aChromosomal positions are based on the 1000 Genomes Project’s haplotype phase 1 in NCBI build 37 (hg19).
	The P-value for the association with phenotype in Q1 and Q4 respectively were assessed by using Plink v.1.9.0 with adjustment for age, sex, genotyping array and PC1~10.

## Sheet: Table S3
	Table S3. The differences in the obesity-related traits between age groups
	Phenotype	SNP	major allele	minor allele	genotype	Q1 (mean ± SD)	Q4 (mean ± SD)
	BMI (kg/m2)	rs2258461	A	G	AA	27.01 ± 4.96	27.46 ± 4.37
					AG+GG	26.94 ± 4.89	27.58 ± 4.40
	BFP (%)	rs9861311	C	G	CC	29.82 ± 8.70	31.96 ± 8.21
					CG+GG	29.68 ± 8.59	32.16 ± 8.16
		rs429358	T	C	TT	29.73 ± 8.64	32.21 ± 8.18
					TC+CC	29.71 ± 8.61	31.81 ± 8.17
	WHR	rs2870099	T	C	TT	0.852 ± 0.088	0.889 ± 0.089
					TC+CC	0.855 ± 0.088	0.887 ± 0.089
	WC (cm)	rs145500243	C	T	CC	88.15 ± 13.52	91.98 ± 12.91
					CT+TT	87.57 ± 13.56	92.58 ± 12.83

## Sheet: Table S4
					5
	Table S4. Effects of the five lead SNPs on other obesity-related phenotypes as well as in all four quartile groups
	SNP	Quartile	BMI			BFP			WHR			WC			HC
			Beta (SE)	P		Beta (SE)	P		Beta (SE)	P		Beta (SE)	P		Beta (SE)	P
	rs2258461	Q1	-0.076 (0.024)	0.001559		-0.102 (0.033)	0.001645		-0.001 (0.0003)	0.009518		-0.193 (0.058)	0.0009287		-0.131 (0.046)	0.004111
		Q2	0.012 (0.024)	0.6013		-0.021 (0.031)	0.5046		-0.0002 (0.0003)	0.492		-0.013 (0.059)	0.8263		0.009 (0.045)	0.8483
		Q3	-0.001 (0.023)	0.978		0.001 (0.031)	0.7599		-0.0005 (0.0003)	0.118		-0.063 (0.059)	0.2822		-0.109 (0.045)	0.8094
		Q4	0.091 (0.022)	3.68e-05		0.080 (0.030)	0.0079		0.0006 (0.0003)	0.05886		0.166 (0.057)	0.003807		0.109 (0.043)	0.01234
	rs9861311	Q1	-0.124 (0.024)	1.232e-07		-0.147 (0.032)	4.2e-06		-0.0011 (0.0003)	0.0005423		-0.263 (0.057)	4.38e-06		-0.178 (0.045)	6.89e-05
		Q2	-0.022 (0.023)	0.3487		0.006 (0.030)	0.8326		0.0002 (0.0003)	0.3581		-0.011 (0.058)	0.8425		-0.048 (0.046)	0.2805
		Q3	0.008 (0.023)	0.7195		0.022 (0.030)	0.4672		0.0006 (0.0003)	0.0835		0.075 (0.058)	0.1933		0.018 (0.044)	0.686
		Q4	0.015 (0.022)	0.4757		0.075 (0.030)	0.0118		0.0005 (0.0003)	0.07332		0.061 (0.056)	0.2798		-0.001 (0.043)	0.9771
	rs429358	Q1	-0.019 (0.032)	0.5462		-0.021 (0.043)	0.6335		-0.0017 (0.0004)	4.88e-05		-0.104 (0.077)	0.1801		0.090 (0.060)	0.135
		Q2	-0.073 (0.031)	0.02026		-0.086 (0.041)	0.03576		-0.0012 (0.0004)	0.004609		-0.198 (0.078)	0.01081		-0.079 (0.060)	0.1868
		Q3	-0.122 (0.031)	7.781e-05		-0.198 (0.041)	1.587e-06		-0.0025 (0.0004)	8.38e-09		-0.358 (0.078)	4.84e-06		-0.112 (0.060)	0.06091
		Q4	-0.225 (0.029)	2.317e-14		-0.325 (0.040)	1.01e-15		-0.0035 (0.0004)	4.159e-15		-0.635 (0.077)	1.23e-16		-0.319 (0.058)	3.94e-08
	rs2870099	Q1	0.062 (0.033)	0.05656		0.043 (0.044)	0.3289		0.0018 (0.0004)	5.361e-05		0.219 (0.079)	0.005782		0.037 (0.062)	0.5477
		Q2	0.012 (0.032)	0.7158		-0.021 (0.042)	0.6244		0.0002 (0.0004)	0.7113		0.016 (0.080)	0.8404		-0.008 (0.062)	0.8919
		Q3	0.058 (0.032)	0.06537		0.084 (0.042)	0.04668		0.0010 (0.0004)	0.02616		0.218 (0.080)	0.006687		0.131 (0.061)	0.0328
		Q4	-0.067 (0.030)	0.02501		-0.084 (0.041)	0.04013		-0.0018 (0.0004)	7.57e-05		-0.254 (0.078)	0.001088		-0.073 (0.059)	0.2191
	rs145500243	Q1	-0.239 (0.066)	0.0002742		-0.344 (0.089)	0.0001076		-0.0025 (0.0009)	0.003947		-0.596 (0.160)	0.0001941		-0.415 (0.125)	0.0008762
		Q2	-0.143 (0.063)	0.02454		-0.189 (0.083)	0.02295		-0.0022 (0.0009)	0.01006		-0.419 (0.158)	0.007914		-0.219 (0.122)	0.07168
		Q3	-0.074 (0.063)	0.2407		-0.021 (0.084)	0.8059		-0.0016 (0.0009)	0.08249		-0.209 (0.159)	0.1895		-0.055 (0.122)	0.6499
		Q4	0.164 (0.059)	0.005465		0.174 (0.081)	0.03245		0.0036 (0.0009)	6.83e-05		0.539 (0.154)	0.0004644		0.194 (0.117)	0.09567
	The P for the effects on phenotypes were assessed by using a Plink v.1.9.0 with adjustment for age, sex, genotyping array and PC1~10.

## Sheet: Table S5
	Table S5. Functional annotation of the five lead SNPs
	Chromosome	Nearest gene	SNP	dbSNP functional annotation	RegulomeDB score	RegulomeDB rank
	9	KLF4	rs2258461	-	0	5
	3	TFRC*	rs9861311	intronic	0.22	6
	19	APOE*	rs429358	missense	0.61	4
	19	AC006115.1	rs2870099	-	0.18	7
	4	RP11-310I9.1	rs145500243	-	0.39	6
	We investigated five lead SNPs functional annotation using Regulome DB.
	Regulome DB rank refers to the following available datatypes for a single coordinate: 4 – TF binding + DNase peak, 5 – TF binding or DNase peak, 6 – Motif hit, 7 – Other.
	The Regulome DB score represents a model integrating functional genomics features along with continuous values such as ChIP-seq signal, DNase-seq signal, information content change, and DeepSEA scores among others.

## Sheet: Table S6
	Table S6. Diseases and traits with which the five lead SNPs show genome-wide significant association in PhenoScanner.
	Chromosome	SNP	Trait	A1/A2	PMID	Beta	P
	9	rs2258461	-
	3	rs9861311	-
	19	rs429358	Alzheimers disease	C/T	24162737	1.35	6.70E-536
			Illnesses of mother: alzheimers disease or dementia	C/T	UKBB	0.0467	0
			Illnesses of father: alzheimers disease or dementia	C/T	UKBB	0.02411	2.149e-226
			Self-reported high cholesterol	C/T	UKBB	0.02727	9.483e-137
			Late onset Alzheimers disease	C/T	21390209	NA	2.74e-78
			Treatment with cholesterol lowering medication	C/T	UKBB	0.02594	5.227e-65
			Dementia with Lewy bodies	C/T	29263008	0.9002	3e-64
			Medication for cholesterol, blood pressure or diabetes: cholesterol lowering medication	C/T	UKBB	0.0336	2.342e-58
			Late onset Alzheimers disease	C/T	20885792	NA	5.49e-58
			Late onset Alzheimers disease	C/T	23571587	NA	5.5e-47
			Treatment with simvastatin	C/T	UKBB	0.01471	8.948e-44
			Advanced age related macular degeneration	C/T	26691988	NA	2e-42
			Age-related macular degeneration	C/T	26691988	NA	2.39e-42
			Treatment with atorvastatin	C/T	UKBB	0.007215	2.151e-36
			Cerebral amyloid deposition PET imaging	C/T	26252872	-0.13	8e-32
			Illnesses of siblings: alzheimers disease or dementia	C/T	UKBB	0.003247	1.068e-31
			APOE apolipoprotein E	C/T	21418511	NA	7.42e-28
			Parental lifespan	C/T	29030599	0.9	1e-27
			Coronary artery disease	C/T	29212778	0.0887	3.281e-27
			Red cell distribution width	C/T	27863252	0.05202	8e-26
			Red cell distribution width	C/T	27863252	-0.05202	8.317e-26
			Low density lipoprotein	C/T	28887542	0.2	2.969e-24
			C-reactive protein	C/T	28887542	-0.22	9.205e-23
			APOE apolipoprotein E females	C/T	21418511	NA	1.13e-22
			Lifespan	C/T	27029810	0.1014	1e-20
			Illnesses of mother: none of the above, group 1	C/T	UKBB	-0.01604	1.15e-20
			Posterior cortical atrophy	C/T	26993346	NA	3.72e-20
			Cerebral amyloid deposition positivity PET imaging	C/T	26252872	NA	5e-20
			Total cholesterol	C/T	28887542	0.18	5.566e-20
			Coronary artery disease	C/T	29212778	0.08776	7.2e-20
			Alzheimers disease age of onset	C/T	22005931	NA	3.37e-18
			Treatment with ezetimibe	C/T	UKBB	0.002199	1.34e-17
			Cerebrospinal AB1 42 levels in Alzheimers disease dementia	C/T	25027320	NA	4e-17
			Treatment with lipitor 10mg tablet	C/T	UKBB	0.002331	7.974e-17
			Alzheimers disease	C/T	19668339	NA	2.3e-16
			Waist circumference	C/T	UKBB	-0.02418	3.191e-16
			Medication for cholesterol, blood pressure or diabetes: none of the above	C/T	UKBB	-0.01889	5.697e-16
			Plateletcrit	C/T	27863252	-0.04066	2.026e-15
			Mother still alive	C/T	UKBB	-0.01309	2.299e-15
			Leg fat percentage left	C/T	UKBB	-0.01621	9.242e-15
			HDL cholesterol	C/T	25961943	-0.066	1e-14
			Leg fat mass left	C/T	UKBB	-0.02037	1.292e-14
			Cognitive decline age related	C/T	28078323	NA	2e-14
			Illnesses of mother: diabetes	C/T	UKBB	-0.007609	3.15e-14
			Leg fat percentage right	C/T	UKBB	-0.01604	3.598e-14
			Weight change compared with 1 year ago	C/T	UKBB	-0.01644	4.196e-14
			Alzheimers disease biomarkers	C/T	23419831	NA	5e-14
			Cortical amyloid beta load	C/T	23419831	NA	5.45e-14
			Self-reported dementia or alzheimers/cognitive impairment	C/T	UKBB	0.0003939	7.345e-14
			Leg fat mass right	C/T	UKBB	-0.01994	8.735e-14
			Treatment with rosuvastatin	C/T	UKBB	0.001935	1.977e-13
			Body mass index	C/T	UKBB	-0.02377	6.619e-13
			No treatment with medication for cholesterol, blood pressure, diabetes, or take exogenous hormones	C/T	UKBB	-0.01523	7.685e-13
			Lewy body disease	C/T	25188341	0.4997	1e-12
			Blood protein levels	C/T	28240269	NA	2e-12
			Body fat percentage	C/T	UKBB	-0.01781	3.735e-12
			Whole body fat mass	C/T	UKBB	-0.02262	4.136e-12
			Lewy body disease	C/T	25188341	0.508	5e-12
			Cognitive ageing females	C/T	23207651	NA	1.19e-11
			Arm fat mass right	C/T	UKBB	-0.02203	1.793e-11
			APOE apolipoprotein E males	C/T	21418511	NA	2.74e-11
			Lewy body disease	C/T	25188341	0.4905	3e-11
			Arm fat mass left	C/T	UKBB	-0.02171	3.488e-11
			Cognitive ageing	C/T	23207651	NA	3.66e-11
			Coronary artery disease	C/T	28714975	0.08321	4.54e-11
			Trunk fat mass	C/T	UKBB	-0.02184	8.906e-11
			Type II diabetes	C/T	28566273	-0.12	1.4e-10
			Trunk fat percentage	C/T	UKBB	-0.01957	1.927e-10
			LDL cholesterol change with statins	C/T	20031582	NA	4.21e-10
			Weight	C/T	UKBB	-0.01816	5.177e-10
			Pulse rate	C/T	UKBB	-0.02131	6.43e-10
			Cause of death: alzheimers disease, unspecified	C/T	UKBB	0.008072	9.023e-10
			Brain imaging	C/T	20100581	NA	1e-09
			Arm fat percentage left	C/T	UKBB	-0.01543	1.093e-09
			Illnesses of father: none of the above, group 1	C/T	UKBB	-0.01047	1.598e-09
			Arm fat percentage right	C/T	UKBB	-0.01534	1.605e-09
			Coronary artery disease	C/T	26343387	0.09085	2.17e-09
			Chronic ischaemic heart disease	C/T	UKBB	0.003158	2.644e-09
			Platelet count	C/T	27863252	0.0302	3e-09
			Platelet count	C/T	27863252	-0.0302	3.258e-09
			Treatment with ezetrol 10mg tablet	C/T	UKBB	0.0008417	4.918e-09
			Fathers age at death	C/T	UKBB	-0.0225	5.487e-09
			Mothers age at death	C/T	UKBB	-0.02507	5.924e-09
			Illnesses of father: diabetes	C/T	UKBB	-0.006039	6.76e-09
			Cause of death: unspecified dementia	C/T	UKBB	0.009096	7.479e-09
			Myocardial infarction	C/T	26343387	0.09619	1.368e-08
			Frequency of stair climbing in last 4 weeks	C/T	UKBB	0.02394	3.944e-08
			Number of days or week of moderate physical activity 10+ minutes	C/T	UKBB	0.04364	4.998e-08
			Self-reported heart attack or myocardial infarction	C/T	UKBB	0.002722	5.039e-08
			Illnesses of mother: high blood pressure	C/T	UKBB	-0.008696	5.294e-08
			Number of days or week of vigorous physical activity 10+ minutes	C/T	UKBB	0.03606	5.527e-08
			Vascular or heart problems diagnosed by doctor: angina	C/T	UKBB	0.003165	6.267e-08
			Vascular or heart problems diagnosed by doctor: heart attack	C/T	UKBB	0.002706	6.941e-08
			Self-reported angina	C/T	UKBB	0.003112	9.779e-08
			Brain imaging	C/T	20100581	NA	1e-07
			Pain type experienced in last month: back pain	C/T	UKBB	-0.007707	1.295e-07
			LDL cholesterol female	C/T	21647738	NA	2.3e-07
			Mean corpuscular hemoglobin concentration	C/T	27863252	0.02482	3.011e-07
			Diabetes diagnosed by doctor	C/T	UKBB	-0.0036	5.123e-07
			Alzheimers disease biomarkers	C/T	21123754	NA	1e-06
			Alzheimer disease	C/T	21123754	NA	1e-06
			Late onset Alzheimers disease	C/T	22785395	NA	1.02e-06
			Platelet distribution width	C/T	27863252	0.02449	1.131e-06
			Pulse rate	C/T	UKBB	-0.02808	1.694e-06
			Diastolic blood pressure	C/T	UKBB	-0.0162	1.772e-06
			Arm predicted mass left	C/T	UKBB	-0.01006	2.024e-06
			Forced vital capacity, best measure	C/T	UKBB	0.01404	2.43e-06
			Father still alive	C/T	UKBB	-0.006718	2.714e-06
			Age related macular degeneration	C/T	22694956	NA	2.8e-06
			Arm fat-free mass left	C/T	UKBB	-0.009849	3.623e-06
			Illnesses of mother: chronic bronchitis or emphysema	C/T	UKBB	-0.003683	4.669e-06
			Forced expiratory volume in 1-second, best measure	C/T	UKBB	0.01428	5.67e-06
			Body mass index	C/T	28892062	-0.02689	7.938e-06
	19	rs2870099	-
	4	rs145500243	-

## Sheet: Table S7
	Table S7. Diseases and traits with which five lead SNPs show the genome-wide significant level of association in GWAS Catalog.
	Chromosome	SNP	Reported traits	Authors	PubMed ID	Title
	9	rs2258461	-
	3	rs9861311	-
	19	rs429358	Alzheimer's disease or family history of Alzheimer's disease	Schwartzentruber J	33589840	Genome-wide meta-analysis, fine-mapping and integrative prioritization implicate new Alzheimer's disease risk genes.
			Acceptance of an invitation to participate in a mental health questionnaire	Tyrrell J	33563987	Genetic predictors of participation in optional components of UK Biobank.
			Alanine aminotransferase levels	Chen VL	33547301	Genome-wide association study of serum liver enzymes implicates diverse metabolic and liver pathology.
			Myocardial infarction	Hartiala JA	33532862	Genome-wide analysis identifies novel susceptibility loci for myocardial infarction.
			C-reactive protein levels	Nielsen JB	33339817	Loss-of-function genomic variants highlight potential therapeutic targets for cardiovascular disease.
			High density lipoprotein cholesterol levels	Nielsen JB	33339817	Loss-of-function genomic variants highlight potential therapeutic targets for cardiovascular disease.
			Alzheimer's disease	Hong S	33223526	Genome-wide association study of Alzheimer's disease CSF biomarkers in the EMIF-AD Multimodal Biomarker Discovery dataset.
			Amyloid status (abnormal vs normal)	Hong S	33223526	Genome-wide association study of Alzheimer's disease CSF biomarkers in the EMIF-AD Multimodal Biomarker Discovery dataset.
			Amyloid pathology	Hong S	33223526	Genome-wide association study of Alzheimer's disease CSF biomarkers in the EMIF-AD Multimodal Biomarker Discovery dataset.
			Central cerebrospinal fluid amyloid beta 42 levels	Hong S	33223526	Genome-wide association study of Alzheimer's disease CSF biomarkers in the EMIF-AD Multimodal Biomarker Discovery dataset.
			Central cerebrospinal fluid amyloid beta 42 to 40 ratio (abnormal vs normal)	Hong S	33223526	Genome-wide association study of Alzheimer's disease CSF biomarkers in the EMIF-AD Multimodal Biomarker Discovery dataset.
			Central cerebrospinal fluid amyloid beta 42 to 40 ratio	Hong S	33223526	Genome-wide association study of Alzheimer's disease CSF biomarkers in the EMIF-AD Multimodal Biomarker Discovery dataset.
			Parkinson's disease progression (cognitive)	Tan MMX	33111402	Genome-Wide Association Studies of Cognitive and Motor Progression in Parkinson's Disease.
			Parkinson's disease progression (composite)	Tan MMX	33111402	Genome-Wide Association Studies of Cognitive and Motor Progression in Parkinson's Disease.
			Abdominal aortic aneurysm	Klarin D	32981348	Genetic Architecture of Abdominal Aortic Aneurysm in the Million Veteran Program.
			Serum C-reactive protein concentration	Jung SY	32928877	Genome-wide association analysis of pro-inflammatory cytokines and gene-lifestyle interaction for invasive breast cancer risk: the WHI dbGaP Study.
			Serum type 1 collagen metabolite levels	Tang ME	33134509	Matrix metalloproteinase-degraded type I collagen is associated with APOE/TOMM40 variants and preclinical dementia.
			Red cell distribution width	Vuckovic D	32888494	The Polygenic and Monogenic Basis of Blood Traits and Diseases.
			Mean reticulocyte volume	Vuckovic D	32888494	The Polygenic and Monogenic Basis of Blood Traits and Diseases.
			Mean spheric corpuscular volume	Vuckovic D	32888494	The Polygenic and Monogenic Basis of Blood Traits and Diseases.
			Plateletcrit	Vuckovic D	32888494	The Polygenic and Monogenic Basis of Blood Traits and Diseases.
			Platelet count	Vuckovic D	32888494	The Polygenic and Monogenic Basis of Blood Traits and Diseases.
			Aging traits (healthspan, parental lifespan or longevity) (multivariate analysis)	Timmers PRHJ	32678081	Multivariate genomic scan implicates novel loci and haem metabolism in human ageing.
			Type 2 diabetes	Vujkovic M	32541925	Discovery of 318 new risk loci for type 2 diabetes and related vascular outcomes among 1.4 million participants in a multi-ancestry meta-analysis.
			Relative sugar intake	Meddens SFW	32393786	Genomic analysis of diet composition finds novel loci and associations with health and lifestyle.
			Adult body size	Richardson TG	32376654	Use of genetic variation to separate the effects of early and later life adiposity on disease risk: mendelian randomisation study.
			White matter hyperintensities	Persyn E	32358547	Genome-wide association study of MRI markers of cerebral small vessel disease in 42,310 participants.
			Spherical equivalent	Han X	32352494	Association of Myopia and Intraocular Pressure With Retinal Detachment in European Descent Participants of the UK Biobank Cohort: A Mendelian Randomization Study.
			Liver fat content (MRI proton density fat fraction measure)	Parisinos CA	32247823	Genome-wide and Mendelian randomisation studies of liver MRI yield insights into the pathogenesis of steatohepatitis.
			Serum 25-Hydroxyvitamin D levels	Revez JA	32242144	Genome-wide association study identifies 143 loci associated with 25 hydroxyvitamin D concentration.
			Refractive error	Hysi PG	32231278	Meta-analysis of 542,934 subjects of European ancestry identifies new genes and mechanisms predisposing to refractive error and myopia.
			Apolipoprotein A1 levels	Richardson TG	32203549	Evaluating the relationship between circulating lipoprotein lipids and apolipoproteins with risk of coronary heart disease: A multivariable Mendelian randomisation analysis.
			HDL cholesterol levels	Richardson TG	32203549	Evaluating the relationship between circulating lipoprotein lipids and apolipoproteins with risk of coronary heart disease: A multivariable Mendelian randomisation analysis.
			Lamb consumption	Niarchou M	32066663	Genome-wide association study of dietary intake in the UK biobank study and its associations with schizophrenia and other traits.
			Meat-related diet	Niarchou M	32066663	Genome-wide association study of dietary intake in the UK biobank study and its associations with schizophrenia and other traits.
			C-reactive protein levels	Han X	31900758	Using Mendelian randomization to evaluate the causal relationship between serum C-reactive protein levels and age-related macular degeneration.
			HDL cholesterol levels x short total sleep time interaction (2df test)	Noordam R	31719535	Multi-ancestry sleep-by-SNP interaction analysis in 126,926 individuals reveals lipid loci stratified by sleep duration.
			Adult onset asthma or type 2 diabetes	Zhu Z	31719535	Shared Genetic and Experimental Links between Obesity-Related Traits and Asthma Subtypes in UK Biobank.
			Waist-to-hip ratio adjusted for BMI	Zhu Z	31719535	Shared Genetic and Experimental Links between Obesity-Related Traits and Asthma Subtypes in UK Biobank.
			Parental longevity (mother's age at death or mother's attained age)	Wright KM	31484785	A Prospective Analysis of Genetic Variants Associated with Human Lifespan.
			Neuritic plaque	Dumitrescu L	31497858	Sex differences in the genetic predictors of Alzheimer's pathology.
			Neuritic plaque	Dumitrescu L	31497858	Sex differences in the genetic predictors of Alzheimer's pathology.
			Neurofibrillary tangles	Dumitrescu L	31497858	Sex differences in the genetic predictors of Alzheimer's pathology.
			Neurofibrillary tangles	Dumitrescu L	31497858	Sex differences in the genetic predictors of Alzheimer's pathology.
			Longevity (age >90th survival percentile)	Deelen J	31413261	A meta-analysis of genome-wide association studies identifies multiple longevity genes.
			Longevity (age >99th survival percentile)	Deelen J	31413261	A meta-analysis of genome-wide association studies identifies multiple longevity genes.
			Alzheimer's disease	Moreno-Grau S	31473137	Genome-wide association analysis of dementia and its clinical endophenotypes reveal novel loci associated with Alzheimer's disease and three causality networks: The GR@ACE project.
			Alzheimer’s disease and/or vascular dementia (clinical subgroup VaD+)	Moreno-Grau S	31473137	Genome-wide association analysis of dementia and its clinical endophenotypes reveal novel loci associated with Alzheimer's disease and three causality networks: The GR@ACE project.
			Alzheimer’s disease (clinical subgroup AD+)	Moreno-Grau S	31473137	Genome-wide association analysis of dementia and its clinical endophenotypes reveal novel loci associated with Alzheimer's disease and three causality networks: The GR@ACE project.
			Alzheimer’s disease (clinical subgroup AD++)	Moreno-Grau S	31473137	Genome-wide association analysis of dementia and its clinical endophenotypes reveal novel loci associated with Alzheimer's disease and three causality networks: The GR@ACE project.
			Alzheimer’s disease (clinical subgroup AD+++)	Moreno-Grau S	31473137	Genome-wide association analysis of dementia and its clinical endophenotypes reveal novel loci associated with Alzheimer's disease and three causality networks: The GR@ACE project.
			Mental health study participation (completed survey)	Adams MJ	31263887	Factors associated with sharing e-mail information and mental health survey participation in large population cohorts.
			Dementia with Lewy bodies	Rongve A	31065058	GBA and APOE ε4 associate with sporadic dementia with Lewy bodies in European genome wide association study.
			Alzheimer's disease in hypertension	Nazarian A	31055733	Genetic heterogeneity of Alzheimer's disease in subjects with and without hypertension.
			Alzheimer's disease in hypertension-negative individuals	Nazarian A	31055733	Genetic heterogeneity of Alzheimer's disease in subjects with and without hypertension.
			Parkinson's disease (age of onset)	Blauwendraat C	30957308	Parkinson's disease age at onset genome-wide association study: Defining heritability, genetic loci, and α-synuclein mechanisms.
			Alzheimer's disease (onset at age over 80)	Lo MT	30979435	Identification of genetic heterogeneity of Alzheimer's disease across age.
			Alzheimer's disease (onset between ages 58 and 79)	Lo MT	30979435	Identification of genetic heterogeneity of Alzheimer's disease across age.
			Age-related cognitive decline (memory) (slope of z-scores)	Kamboh MI	30954325	Population-based genome-wide association study of cognitive decline in older adults free of dementia: identification of a novel locus for the attention domain.
			Insomnia	Jansen PR	30804565	Genome-wide analysis of insomnia in 1,331,010 individuals identifies new risk loci and functional pathways.
			Parental lifespan	Timmers PR	30642433	Genomics of 1 million parent lifespans implicates novel pathways and common diseases and distinguishes survival chances.
			Alzheimer's disease	Nazarian A	30636644	Genome-wide analysis of genetic predisposition to Alzheimer's disease and related sex disparities.
			Waist-hip ratio	Kichaev G	30595370	Leveraging Polygenic Functional Enrichment to Improve GWAS Power.
			C-reactive protein levels	Ligthart S	30388399	Genome Analyses of &gt;200,000 Individuals Identify 58 Loci for Chronic Inflammation and Highlight Pathways that Link Inflammation and Complex Disorders.
			Cerebral amyloid deposition (PET imaging)	Yan Q	30361487	Genome-wide association study of brain amyloid deposition as measured by Pittsburgh Compound-B (PiB)-PET imaging.
			Type 2 diabetes	Mahajan A	30297969	Fine-mapping type 2 diabetes loci to single-variant resolution using high-density imputation and islet-specific epigenome maps.
			HDL cholesterol	Klarin D	30275531	Genetics of blood lipids among ~300,000 multi-ethnic participants of the Million Veteran Program.
			Waist-hip ratio	Pulit SL	30239722	Meta-analysis of genome-wide association studies for body fat distribution in 694,649 individuals of European ancestry.
			Hyperopia	Shaaban S	30098192	Genome-Wide Association Study Identifies a Susceptibility Locus for Comitant Esotropia and Suggests a Parent-of-Origin Effect.
			Vigorous physical activity	Klimentidis YC	29899525	Genome-wide association study of habitual physical activity in over 377,000 UK Biobank participants identifies multiple variants including CADM2 and APOE.
			Moderate to vigorous physical activity levels	Klimentidis YC	29899525	Genome-wide association study of habitual physical activity in over 377,000 UK Biobank participants identifies multiple variants including CADM2 and APOE.
			Blood protein levels	Sun BB	29875488	Genomic atlas of the human plasma proteome.
			Hippocampal volume	Scelsi MA	29860282	Genetic study of multimodal imaging Alzheimer's disease progression score implicates novel loci.
			Cortical amyloid beta load	Scelsi MA	29860282	Genetic study of multimodal imaging Alzheimer's disease progression score implicates novel loci.
			Alzheimer's disease progression score	Scelsi MA	29860282	Genetic study of multimodal imaging Alzheimer's disease progression score implicates novel loci.
			Low density lipoprotein cholesterol levels	Hoffmann TJ	29507422	A large electronic-health-record-based genome-wide study of serum lipids.
			Triglycerides	Hoffmann TJ	29507422	A large electronic-health-record-based genome-wide study of serum lipids.
			High density lipoprotein cholesterol levels	Hoffmann TJ	29507422	A large electronic-health-record-based genome-wide study of serum lipids.
			Total cholesterol levels	Hoffmann TJ	29507422	A large electronic-health-record-based genome-wide study of serum lipids.
			Neurofibrillary tangles or cerebral amyloid angiopathy (pleiotropy)	Chung J	29458411	Genome-wide pleiotropy analysis of neuropathological traits related to Alzheimer's disease.
			Neuritic plaques or neurofibrillary tangles (pleiotropy)	Chung J	29458411	Genome-wide pleiotropy analysis of neuropathological traits related to Alzheimer's disease.
			Neuritic plaques or cerebral amyloid angiopathy (pleiotropy)	Chung J	29458411	Genome-wide pleiotropy analysis of neuropathological traits related to Alzheimer's disease.
			C-reactive protein levels	Kanai M	29403010	Genetic analysis of quantitative traits in the Japanese population links cell types to complex human diseases.
			Low density lipoprotein cholesterol levels	Kanai M	29403010	Genetic analysis of quantitative traits in the Japanese population links cell types to complex human diseases.
			Total cholesterol levels	Kanai M	29403010	Genetic analysis of quantitative traits in the Japanese population links cell types to complex human diseases.
			High density lipoprotein cholesterol levels	Kanai M	29403010	Genetic analysis of quantitative traits in the Japanese population links cell types to complex human diseases.
			Dementia with Lewy bodies	Guerreiro R	29263008	Investigating the genetic architecture of dementia with Lewy bodies: a two-stage genome-wide association study.
			Cerebrospinal AB1-42 levels in mild cognitive impairment	Chung J	29274321	Genome-wide association study of Alzheimer's disease endophenotypes at prediagnosis stages.
			Cerebrospinal fluid t-tau levels in mild cognitive impairment	Chung J	29274321	Genome-wide association study of Alzheimer's disease endophenotypes at prediagnosis stages.
			Cerebrospinal fluid t-tau levels	Chung J	29274321	Genome-wide association study of Alzheimer's disease endophenotypes at prediagnosis stages.
			Logical memory (immediate recall)	Chung J	29274321	Genome-wide association study of Alzheimer's disease endophenotypes at prediagnosis stages.
			Logical memory (delayed recall)	Chung J	29274321	Genome-wide association study of Alzheimer's disease endophenotypes at prediagnosis stages.
			Cerebrospinal fluid p-tau levels in mild cognitive impairment	Chung J	29274321	Genome-wide association study of Alzheimer's disease endophenotypes at prediagnosis stages.
			Cerebrospinal fluid AB1-42 levels	Chung J	29274321	Genome-wide association study of Alzheimer's disease endophenotypes at prediagnosis stages.
			Cerebrospinal fluid p-tau levels	Chung J	29274321	Genome-wide association study of Alzheimer's disease endophenotypes at prediagnosis stages.
			Hippocampal volume	Chung J	29274321	Genome-wide association study of Alzheimer's disease endophenotypes at prediagnosis stages.
			Cerebrospinal AB1-42 levels in normal cognition	Chung J	29274321	Genome-wide association study of Alzheimer's disease endophenotypes at prediagnosis stages.
			Parental longevity (mother's age at death)	Pilling LC	29227965	Human longevity: 25 genetic loci associated in 389,166 UK biobank participants.
			Parental longevity (father's age at death)	Pilling LC	29227965	Human longevity: 25 genetic loci associated in 389,166 UK biobank participants.
			Parental longevity (both parents in top 10%)	Pilling LC	29227965	Human longevity: 25 genetic loci associated in 389,166 UK biobank participants.
			Parental longevity (mother's attained age)	Pilling LC	29227965	Human longevity: 25 genetic loci associated in 389,166 UK biobank participants.
			Parental longevity (combined parental age at death)	Pilling LC	29227965	Human longevity: 25 genetic loci associated in 389,166 UK biobank participants.
			Parental longevity (father's attained age)	Pilling LC	29227965	Human longevity: 25 genetic loci associated in 389,166 UK biobank participants.
			Parental longevity (combined parental attained age, Martingale residuals)	Pilling LC	29227965	Human longevity: 25 genetic loci associated in 389,166 UK biobank participants.
			Parental lifespan	Joshi PK	29030599	Genome-wide meta-analysis associates HLA-DQA1/DRB1 and LPA and lifestyle factors with human longevity.
			Neuritic plaque	Chibnik LB	28322283	Susceptibility to neurofibrillary tangles: role of the PTPRD locus and limited pleiotropy with other neuropathologies.
			Diffuse plaques	Chibnik LB	28322283	Susceptibility to neurofibrillary tangles: role of the PTPRD locus and limited pleiotropy with other neuropathologies.
			Neurofibrillary tangles	Chibnik LB	28322283	Susceptibility to neurofibrillary tangles: role of the PTPRD locus and limited pleiotropy with other neuropathologies.
			Cerebral amyloid angiopathy	Chibnik LB	28322283	Susceptibility to neurofibrillary tangles: role of the PTPRD locus and limited pleiotropy with other neuropathologies.
			Neuropathologic traits (pleiotropy)	Chibnik LB	28322283	Susceptibility to neurofibrillary tangles: role of the PTPRD locus and limited pleiotropy with other neuropathologies.
			Blood protein levels	Suhre K	28240269	Connecting genetic risk to disease end points through the human blood plasma proteome.
			Cognitive decline (age-related)	Raj T	28078323	Genetic architecture of age-related cognitive decline in African Americans.
			Red cell distribution width	Astle WJ	27863252	The Allelic Landscape of Human Blood Cell Trait Variation and Links to Common Complex Disease.
			Platelet count	Astle WJ	27863252	The Allelic Landscape of Human Blood Cell Trait Variation and Links to Common Complex Disease.
			Mortality	Joshi PK	27029810	Variants near CHRNA3/5 and APOE have age- and sex-related effects on human lifespan.
			Advanced age-related macular degeneration	Fritsche LG	26691988	A large genome-wide association study of age-related macular degeneration highlights contributions of rare and common variants.
			Cerebral amyloid deposition positivity (PET imaging)	Li QS	26252872	Variations in the FRA10AC1 Fragile Site and 15q21 Are Associated with Cerebrospinal Fluid Aβ1-42 Level.
			Cerebral amyloid deposition (PET imaging)	Li QS	26252872	Variations in the FRA10AC1 Fragile Site and 15q21 Are Associated with Cerebrospinal Fluid Aβ1-42 Level.
			HDL cholesterol	Surakka I	25961943	The impact of low-frequency and rare variants on lipid levels.
			Lewy body disease	Beecham GW	25188341	Genome-wide association meta-analysis of neuropathologic features of Alzheimer's disease and related dementias.
			Cerebrospinal AB1-42 levels in Alzheimer's disease dementia	Ramirez A	25027320	SUCLG2 identified as both a determinator of CSF Aβ1-42 levels and an attenuator of cognitive decline in Alzheimer's disease.
			Alzheimer's disease biomarkers	Ramanan VK	23419831	APOE and BCHE as modulators of cerebral amyloid deposition: a florbetapir PET genome-wide association study.
			Alzheimer's disease biomarkers	Kim S	21123754	Genome-wide association study of CSF biomarkers Abeta1-42, t-tau, and p-tau181p in the ADNI cohort.
			Brain imaging	Shen L	20100581	Whole genome association study of brain-wide imaging phenotypes for identifying quantitative trait loci in MCI and AD: A study of the ADNI cohort.
	19	rs2870099	-
	4	rs145500243	-

## Sheet: Table S8
	Table S8. eQTL information for the five SNPs showing genome-wide significance.
	Chromosome	SNP class	Position (hg19)	Sentinel SNP	Genome Locus	Position (hg19)	Sentinel	Proxy	r2	Tested allele	Direction	Gene(ref. eQTL)	eQTL P	eQTL effect size	Tissue	Dataset
	3	sentinel	195760948	rs9861311	TFRC				1	G	+	RP11-141C7.3	1.1e-12	-0.33	Thyroid	https://gtexportal.org/home/
		sentinel	195760948	rs9861311	TFRC				1	G	+	AC069513.4	1.7e-11	-0.49	Pancreas	https://gtexportal.org/home/
		sentinel	195760948	rs9861311	TFRC				1	G	+	RP11-141C7.3	3.9e-10	-0.33	Skin - Not Sun Exposed (Suprapubic)	https://gtexportal.org/home/
		sentinel	195760948	rs9861311	TFRC				1	G	+	AC069513.4	3.3e-09	-0.32	Esophagus - Mucosa	https://gtexportal.org/home/
		sentinel	195760948	rs9861311	TFRC				1	G	-	MUC4	9.5e-09	0.29	Skin - Sun Exposed (Lower leg)	https://gtexportal.org/home/
		sentinel	195760948	rs9861311	TFRC				1	G	+	RP11-141C7.3	1.7e-08	-0.32	Esophagus - Mucosa	https://gtexportal.org/home/
		sentinel	195760948	rs9861311	TFRC				1	G	+	RP11-141C7.3	1.9e-08	-0.41	Ovary	https://gtexportal.org/home/
		sentinel	195760948	rs9861311	TFRC				1	G	-	MUC4	2.9e-08	0.31	Thyroid	https://gtexportal.org/home/
		sentinel	195760948	rs9861311	TFRC				1	G	+	RP11-141C7.3	3.6e-08	-0.42	Pancreas	https://gtexportal.org/home/
		sentinel	195760948	rs9861311	TFRC				1	G	+	RP11-141C7.3	1.1e-07	-0.25	Breast - Mammary Tissue	https://gtexportal.org/home/
		sentinel	195760948	rs9861311	TFRC				1	G	-	RP11-352G9.1	2.4e-07	0.27	Nerve - Tibial	https://gtexportal.org/home/
		sentinel	195760948	rs9861311	TFRC				1	G	+	RP11-141C7.3	2.8e-07	-0.33	Artery - Aorta	https://gtexportal.org/home/
		sentinel	195760948	rs9861311	TFRC				1	G	-	SDHAP1	3.2e-07	0.35	Brain - Nucleus accumbens (basal ganglia)	https://gtexportal.org/home/
		sentinel	195760948	rs9861311	TFRC				1	G	+	AC069513.4	3.3e-07	-0.25	Thyroid	https://gtexportal.org/home/
		sentinel	195760948	rs9861311	TFRC				1	G	+	RP11-141C7.3	3.3e-07	-0.44	Spleen	https://gtexportal.org/home/
		sentinel	195760948	rs9861311	TFRC				1	G	+	AC069513.4	5.3e-07	-0.27	Adipose - Subcutaneous	https://gtexportal.org/home/
		sentinel	195760948	rs9861311	TFRC				1	G	+	RP11-141C7.3	1.3e-06	-0.25	Artery - Tibial	https://gtexportal.org/home/
		sentinel	195760948	rs9861311	TFRC				1	G	-	MUC4	1.6e-06	0.27	Skin - Not Sun Exposed (Suprapubic)	https://gtexportal.org/home/
		sentinel	195760948	rs9861311	TFRC				1	G	+	RP11-141C7.3	2.8e-06	-0.26	Colon - Transverse	https://gtexportal.org/home/
		sentinel	195760948	rs9861311	TFRC				1	G	+	RP11-141C7.3	3.3e-06	-0.19	Muscle - Skeletal	https://gtexportal.org/home/
		sentinel	195760948	rs9861311	TFRC				1	G	-	MUC4	3.7e-06	0.4	Liver	https://gtexportal.org/home/
		sentinel	195760948	rs9861311	TFRC				1	G	-	RP11-480A16.1	4.6e-06	0.13	Thyroid	https://gtexportal.org/home/
		sentinel	195760948	rs9861311	TFRC				1	G	+	RP11-141C7.3	5.4e-06	-0.32	Testis	https://gtexportal.org/home/
		sentinel	195760948	rs9861311	TFRC				1	G	-	SDHAP1	5.6e-06	0.17	Thyroid	https://gtexportal.org/home/
		sentinel	195760948	rs9861311	TFRC				1	G	+	RP11-141C7.3	5.7e-06	-0.38	Brain - Cerebellum	https://gtexportal.org/home/
		sentinel	195760948	rs9861311	TFRC				1	G	-	AC024937.4	5.8e-06	0.21	Muscle - Skeletal	https://gtexportal.org/home/
		sentinel	195760948	rs9861311	TFRC				1	G	+	RP11-141C7.3	6e-06	-0.24	Adipose - Subcutaneous	https://gtexportal.org/home/
		sentinel	195760948	rs9861311	TFRC				1	G	-	AC024937.4	6.3e-06	0.37	Pituitary	https://gtexportal.org/home/
		sentinel	195760948	rs9861311	TFRC				1	G	+	AC069513.4	7.6e-06	-0.27	Heart - Atrial Appendage	https://gtexportal.org/home/
		sentinel	195760948	rs9861311	TFRC				1	G	-	SDHAP1	8.2e-06	0.34	Brain - Cortex	https://gtexportal.org/home/
		sentinel	195760948	rs9861311	TFRC				1	G	+	AC069513.4	9.2e-06	-0.25	Skin - Not Sun Exposed (Suprapubic)	https://gtexportal.org/home/
		sentinel	195760948	rs9861311	TFRC				1	G	+	AC069513.4	9.6e-05	-0.31	Stomach	https://gtexportal.org/home/
		sentinel	195760948	rs9861311	TFRC				1	G	+	RP11-141C7.3	1e-05	-0.46	Vagina	https://gtexportal.org/home/
		sentinel	195760948	rs9861311	TFRC				1	G	+	RP11-141C7.3	1.2e-05	-0.4	Small Intestine - Terminal Iieum	https://gtexportal.org/home/
		sentinel	195760948	rs9861311	TFRC				1	G	-	SDHAP1	1.4e-05	0.16	Muscle - Skeletal	https://gtexportal.org/home/
		sentinel	195760948	rs9861311	TFRC				1	G	+	AC069513.4	1.4e-05	-0.38	Spleen	https://gtexportal.org/home/
		sentinel	195760948	rs9861311	TFRC				1	G	+	RP11-141C7.3	1.9e-05	-0.2	Skin - Sun Exposed (Lower leg)	https://gtexportal.org/home/
		sentinel	195760948	rs9861311	TFRC				1	G	-	SDHAP1	1.9e-05	0.32	Brain - Frontal Cortex (BA9)	https://gtexportal.org/home/
		sentinel	195760948	rs9861311	TFRC				1	G	+	RP11-141C7.3	2.4e-05	-0.22	Adipose - Visceral (Omentum)	https://gtexportal.org/home/
		sentinel	195760948	rs9861311	TFRC				1	G	-	AC124944.3	3.1e-05	0.23	Nerve - Tibial	https://gtexportal.org/home/
		sentinel	195760948	rs9861311	TFRC				1	G	-	RP11-352G9.1	3.1e-05	0.18	Thyroid	https://gtexportal.org/home/
		sentinel	195760948	rs9861311	TFRC				1	G	-	AC024937.4	3.2e-05	0.42	Brain - Cerebellar Hemisphere	https://gtexportal.org/home/
		sentinel	195760948	rs9861311	TFRC				1	G	-	RP11-480A16.1	3.4e-05	0.17	Whole Blood	https://gtexportal.org/home/
		sentinel	195760948	rs9861311	TFRC				1	G	+	AC069513.4	3.6e-05	-0.24	Cells = Cultured fibroblasts	https://gtexportal.org/home/
		sentinel	195760948	rs9861311	TFRC				1	G	+	RP11-141C7.3	3.8e-05	-0.23	Esophagus - Muscularis	https://gtexportal.org/home/
		sentinel	195760948	rs9861311	TFRC				1	G	+	RP11-141C7.3	3.8e-05	-0.23	Nerve - Tibial	https://gtexportal.org/home/
		sentinel	195760948	rs9861311	TFRC				1	G	+	AC069513.4	3.9e-05	-0.21	Skin - Sun Exposed (Lower leg)	https://gtexportal.org/home/
		sentinel	195760948	rs9861311	TFRC				1	G	-	SDHAP1	4.2e-05	0.32	Brain - Cerebellar Hemisphere	https://gtexportal.org/home/
		sentinel	195760948	rs9861311	TFRC				1	G	+	MUC20	6.7e-05	-0.23	Adipose - Visceral (Omentum)	https://gtexportal.org/home/
		proxy	195760948	rs9861311	TFRC	195779706	rs9861311	rs34906439	0.28	A	-	AC024937.4	9.5e-13	-0.42	Thyroid	https://gtexportal.org/home/
		proxy	195760948	rs9861311	TFRC	195779706	rs9861311	rs34906439	0.28	A	-	AC024937.4	3.2e-10	-0.32	Muscle - Skeletal	https://gtexportal.org/home/
		proxy	195760948	rs9861311	TFRC	195779706	rs9861311	rs34906439	0.28	A	-	RP11-480A16.1	2.4e-09	-0.19	Thyroid	https://gtexportal.org/home/
		proxy	195760948	rs9861311	TFRC	195779706	rs9861311	rs34906439	0.28	A	-	RP11-141C7.2	1e-08	-0.31	Thyroid	https://gtexportal.org/home/
		proxy	195760948	rs9861311	TFRC	195779706	rs9861311	rs34906439	0.28	A	-	MUC20	1.1e-08	-0.47	Liver	https://gtexportal.org/home/
		proxy	195760948	rs9861311	TFRC	195779706	rs9861311	rs34906439	0.28	A	-	SDHAP1	1.3e-08	-0.24	Thyroid	https://gtexportal.org/home/
		proxy	195760948	rs9861311	TFRC	195779706	rs9861311	rs34906439	0.28	A	-	AC024937.4	4.4e-08	-0.32	Esophagus - Mucosa	https://gtexportal.org/home/
		proxy	195760948	rs9861311	TFRC	195779706	rs9861311	rs34906439	0.28	A	-	MUC4	5.2e-08	-0.32	Skin - Sun Exposed (Lower leg)	https://gtexportal.org/home/
		proxy	195760948	rs9861311	TFRC	195779706	rs9861311	rs34906439	0.28	A	-	SDHAP1	6.1e-08	-0.22	Muscle - Skeletal	https://gtexportal.org/home/
		proxy	195760948	rs9861311	TFRC	195779706	rs9861311	rs34906439	0.28	A	-	AC024937.4	6.4e-08	-0.36	Colon - Transverse	https://gtexportal.org/home/
		proxy	195760948	rs9861311	TFRC	195779706	rs9861311	rs34906439	0.28	A	-	AC024937.4	8.4e-08	-0.68	Brain - Putamen (basal ganglia)	https://gtexportal.org/home/
		proxy	195760948	rs9861311	TFRC	195779706	rs9861311	rs34906439	0.28	A	-	MUC20	9.4e-08	-0.29	Thyroid	https://gtexportal.org/home/
		proxy	195760948	rs9861311	TFRC	195779706	rs9861311	rs34906439	0.28	A	-	AC024937.4	1.2e-07	-0.35	Lung	https://gtexportal.org/home/
		proxy	195760948	rs9861311	TFRC	195779706	rs9861311	rs34906439	0.28	A	-	MUC4	1.4e-07	-0.32	Thyroid	https://gtexportal.org/home/
		proxy	195760948	rs9861311	TFRC	195779706	rs9861311	rs34906439	0.28	A	-	AC024937.4	2.3e-07	-0.66	Brain - Cerebellar Hemisphere	https://gtexportal.org/home/
		proxy	195760948	rs9861311	TFRC	195779706	rs9861311	rs34906439	0.28	A	-	AC024937.4	3.6e-07	-0.31	Skin - Sun Exposed (Lower leg)	https://gtexportal.org/home/
		proxy	195760948	rs9861311	TFRC	195779706	rs9861311	rs34906439	0.28	A	-	MUC4	3.9e-07	-0.44	Brain - Nucleus accumbens (basal ganglia)	https://gtexportal.org/home/
		proxy	195760948	rs9861311	TFRC	195779706	rs9861311	rs34906439	0.28	A	-	AC024937.4	4.2e-07	-0.49	Pituitary	https://gtexportal.org/home/
		proxy	195760948	rs9861311	TFRC	195779706	rs9861311	rs34906439	0.28	A	-	MUC4	6.3e-07	-0.48	Liver	https://gtexportal.org/home/
		proxy	195760948	rs9861311	TFRC	195779706	rs9861311	rs34906439	0.28	A	-	RP11-141C7.2	7.2e-07	-0.25	Skin - Sun Exposed (Lower leg)	https://gtexportal.org/home/
		proxy	195760948	rs9861311	TFRC	195779706	rs9861311	rs34906439	0.28	A	-	AC024937.4	2.1e-06	-0.53	Brain - Cortex	https://gtexportal.org/home/
		proxy	195760948	rs9861311	TFRC	195779706	rs9861311	rs34906439	0.28	A	-	SDHAP1	2.2e-06	-0.25	Nerve - Tibial	https://gtexportal.org/home/
		proxy	195760948	rs9861311	TFRC	195779706	rs9861311	rs34906439	0.28	A	-	AC024937.4	3.6e-06	-0.5	Brain - Cerebellum	https://gtexportal.org/home/
		proxy	195760948	rs9861311	TFRC	195779706	rs9861311	rs34906439	0.28	A	-	AC024937.4	4e-06	-0.45	Liver	https://gtexportal.org/home/
		proxy	195760948	rs9861311	TFRC	195779706	rs9861311	rs34906439	0.28	A	-	SDHAP1	5.2e-06	-0.22	Adipose - Subcutaneous	https://gtexportal.org/home/
		proxy	195760948	rs9861311	TFRC	195779706	rs9861311	rs34906439	0.28	A	-	AC024937.4	6.4e-06	-0.29	Nerve - Tibial	https://gtexportal.org/home/
		proxy	195760948	rs9861311	TFRC	195779706	rs9861311	rs34906439	0.28	A	-	MUC4	6.9e-06	-0.47	Brain - Cerebellum	https://gtexportal.org/home/
		proxy	195760948	rs9861311	TFRC	195779706	rs9861311	rs34906439	0.28	A	-	AC024937.4	9.7e-06	-0.29	Breast - Mammary Tissue	https://gtexportal.org/home/
		proxy	195760948	rs9861311	TFRC	195779706	rs9861311	rs34906439	0.28	A	-	MIR570	9.8e-06	-0.5	Brain - Cerebellar Hemisphere	https://gtexportal.org/home/
		proxy	195760948	rs9861311	TFRC	195779706	rs9861311	rs34906439	0.28	A	-	MUC4	1e-05	-0.44	Brain - Hypothalamus	https://gtexportal.org/home/
		proxy	195760948	rs9861311	TFRC	195779706	rs9861311	rs34906439	0.28	A	-	AC024937.6	1.2e-05	-0.16	Thyroid	https://gtexportal.org/home/
		proxy	195760948	rs9861311	TFRC	195779706	rs9861311	rs34906439	0.28	A	+	TFRC	1.4e-05	0.32	Spleen	https://gtexportal.org/home/
		proxy	195760948	rs9861311	TFRC	195779706	rs9861311	rs34906439	0.28	A	-	MIR570	1.4e-05	-0.28	Nerve - Tibial	https://gtexportal.org/home/
		proxy	195760948	rs9861311	TFRC	195779706	rs9861311	rs34906439	0.28	A	-	MUC4	1.5e-05	-0.38	Brain - Caudate (basal ganglia)	https://gtexportal.org/home/
		proxy	195760948	rs9861311	TFRC	195779706	rs9861311	rs34906439	0.28	A	-	SDHAP1	1.6e-05	-0.24	Breast - Mammary Tissue	https://gtexportal.org/home/
		proxy	195760948	rs9861311	TFRC	195779706	rs9861311	rs34906439	0.28	A	-	MUC4	1.6e-05	-0.4	Brain - Putamen (basal ganglia)	https://gtexportal.org/home/
		proxy	195760948	rs9861311	TFRC	195779706	rs9861311	rs34906439	0.28	A	-	TFRC	2.2e-05	-0.15	Lung	https://gtexportal.org/home/
		proxy	195760948	rs9861311	TFRC	195779706	rs9861311	rs34906439	0.28	A	-	MIR570	2.4e-05	-0.28	Lung	https://gtexportal.org/home/
		proxy	195760948	rs9861311	TFRC	195779706	rs9861311	rs34906439	0.28	A	-	SDHAP1	2.4e-05	-0.19	Adipose - Visceral (Omentum)	https://gtexportal.org/home/
		proxy	195760948	rs9861311	TFRC	195779706	rs9861311	rs34906439	0.28	A	-	AC024937.4	2.9e-05	-0.37	Adrenal Gland	https://gtexportal.org/home/
		proxy	195760948	rs9861311	TFRC	195779706	rs9861311	rs34906439	0.28	A	-	RP11-141C7.2	3.7e-05	-0.22	Whole Blood	https://gtexportal.org/home/
		proxy	195760948	rs9861311	TFRC	195779706	rs9861311	rs34906439	0.28	A	-	MUC4	4.6e-05	-0.25	Nerve - Tibial	https://gtexportal.org/home/
		proxy	195760948	rs9861311	TFRC	195779706	rs9861311	rs34906439	0.28	A	-	AC024937.4	5.3e-05	-0.27	Skin - Not Sun Exposed (Suprapubic)	https://gtexportal.org/home/
		proxy	195760948	rs9861311	TFRC	195779706	rs9861311	rs34906439	0.28	A	-	TFRC	5.5e-05	-0.18	Artery - Aorta	https://gtexportal.org/home/
		proxy	195760948	rs9861311	TFRC	195779706	rs9861311	rs34906439	0.28	A	-	AC024937.4	6e-05	-0.26	Adipose - Visceral (Omentum)	https://gtexportal.org/home/
		proxy	195760948	rs9861311	TFRC	195779706	rs9861311	rs34906439	0.28	A	-	SDHAP1	9.2e-05	-0.19	Esophagus - Mucosa	https://gtexportal.org/home/
		proxy	195760948	rs9861311	TFRC	195779736	rs9861311	rs41298087	0.28	C	-	AC024937.4	9.5e-13	-0.42	Thyroid	https://gtexportal.org/home/
		proxy	195760948	rs9861311	TFRC	195779736	rs9861311	rs41298087	0.28	C	-	AC024937.4	3.2e-10	-0.32	Muscle - Skeletal	https://gtexportal.org/home/
		proxy	195760948	rs9861311	TFRC	195779736	rs9861311	rs41298087	0.28	C	-	RP11-480A16.1	2.4e-09	-0.19	Thyroid	https://gtexportal.org/home/
		proxy	195760948	rs9861311	TFRC	195779736	rs9861311	rs41298087	0.28	C	-	RP11-141C7.2	1e-08	-0.31	Thyroid	https://gtexportal.org/home/
		proxy	195760948	rs9861311	TFRC	195779736	rs9861311	rs41298087	0.28	C	-	MUC20	1.1e-08	-0.47	Liver	https://gtexportal.org/home/
		proxy	195760948	rs9861311	TFRC	195779736	rs9861311	rs41298087	0.28	C	-	SDHAP1	1.3e-08	-0.24	Thyroid	https://gtexportal.org/home/
		proxy	195760948	rs9861311	TFRC	195779736	rs9861311	rs41298087	0.28	C	-	AC024937.4	4.4e-08	-0.32	Esophagus - Mucosa	https://gtexportal.org/home/
		proxy	195760948	rs9861311	TFRC	195779736	rs9861311	rs41298087	0.28	C	-	MUC4	5.2e-08	-0.32	Skin - Sun Exposed (Lower leg)	https://gtexportal.org/home/
		proxy	195760948	rs9861311	TFRC	195779736	rs9861311	rs41298087	0.28	C	-	SDHAP1	6.1e-08	-0.22	Muscle - Skeletal	https://gtexportal.org/home/
		proxy	195760948	rs9861311	TFRC	195779736	rs9861311	rs41298087	0.28	C	-	AC024937.4	6.4e-08	-0.36	Colon - Transverse	https://gtexportal.org/home/
		proxy	195760948	rs9861311	TFRC	195779736	rs9861311	rs41298087	0.28	C	-	AC024937.4	8.4e-08	-0.68	Brain - Putamen (basal ganglia)	https://gtexportal.org/home/
		proxy	195760948	rs9861311	TFRC	195779736	rs9861311	rs41298087	0.28	C	-	MUC20	9.4e-08	-0.29	Thyroid	https://gtexportal.org/home/
		proxy	195760948	rs9861311	TFRC	195779736	rs9861311	rs41298087	0.28	C	-	AC024937.4	1.2e-07	-0.35	Lung	https://gtexportal.org/home/
		proxy	195760948	rs9861311	TFRC	195779736	rs9861311	rs41298087	0.28	C	-	MUC4	1.4e-07	-0.32	Thyroid	https://gtexportal.org/home/
		proxy	195760948	rs9861311	TFRC	195779736	rs9861311	rs41298087	0.28	C	-	AC024937.4	2.3e-07	-0.66	Brain - Cerebellar Hemisphere	https://gtexportal.org/home/
		proxy	195760948	rs9861311	TFRC	195779736	rs9861311	rs41298087	0.28	C	-	AC024937.4	3.6e-07	-0.31	Skin - Sun Exposed (Lower leg)	https://gtexportal.org/home/
		proxy	195760948	rs9861311	TFRC	195779736	rs9861311	rs41298087	0.28	C	-	MUC4	3.9e-07	-0.44	Brain - Nucleus accumbens (basal ganglia)	https://gtexportal.org/home/
		proxy	195760948	rs9861311	TFRC	195779736	rs9861311	rs41298087	0.28	C	-	AC024937.4	4.2e-07	-0.49	Pituitary	https://gtexportal.org/home/
		proxy	195760948	rs9861311	TFRC	195779736	rs9861311	rs41298087	0.28	C	-	MUC4	6.3e-07	-0.48	Liver	https://gtexportal.org/home/
		proxy	195760948	rs9861311	TFRC	195779736	rs9861311	rs41298087	0.28	C	-	RP11-141C7.2	7.2e-07	-0.25	Skin - Sun Exposed (Lower leg)	https://gtexportal.org/home/
		proxy	195760948	rs9861311	TFRC	195779736	rs9861311	rs41298087	0.28	C	-	AC024937.4	2.1e-06	-0.53	Brain - Cortex	https://gtexportal.org/home/
		proxy	195760948	rs9861311	TFRC	195779736	rs9861311	rs41298087	0.28	C	-	SDHAP1	2.2e-06	-0.25	Nerve - Tibial	https://gtexportal.org/home/
		proxy	195760948	rs9861311	TFRC	195779736	rs9861311	rs41298087	0.28	C	-	AC024937.4	3.6e-06	-0.5	Brain - Cerebellum	https://gtexportal.org/home/
		proxy	195760948	rs9861311	TFRC	195779736	rs9861311	rs41298087	0.28	C	-	AC024937.4	4e-06	-0.45	Liver	https://gtexportal.org/home/
		proxy	195760948	rs9861311	TFRC	195779736	rs9861311	rs41298087	0.28	C	-	SDHAP1	5.2e-06	-0.22	Adipose - Subcutaneous	https://gtexportal.org/home/
		proxy	195760948	rs9861311	TFRC	195779736	rs9861311	rs41298087	0.28	C	-	AC024937.4	6.4e-06	-0.29	Nerve - Tibial	https://gtexportal.org/home/
		proxy	195760948	rs9861311	TFRC	195779736	rs9861311	rs41298087	0.28	C	-	MUC4	6.9e-06	-0.47	Brain - Cerebellum	https://gtexportal.org/home/
		proxy	195760948	rs9861311	TFRC	195779736	rs9861311	rs41298087	0.28	C	-	AC024937.4	9.7e-06	-0.29	Breast - Mammary Tissue	https://gtexportal.org/home/
		proxy	195760948	rs9861311	TFRC	195779736	rs9861311	rs41298087	0.28	C	-	MIR570	9.8e-06	-0.5	Brain - Cerebellar Hemisphere	https://gtexportal.org/home/
		proxy	195760948	rs9861311	TFRC	195779736	rs9861311	rs41298087	0.28	C	-	MUC4	1e-05	-0.44	Brain - Hypothalamus	https://gtexportal.org/home/
		proxy	195760948	rs9861311	TFRC	195779736	rs9861311	rs41298087	0.28	C	-	AC024937.6	1.2e-05	-0.16	Thyroid	https://gtexportal.org/home/
		proxy	195760948	rs9861311	TFRC	195779736	rs9861311	rs41298087	0.28	C	+	TFRC	1.4e-05	0.32	Spleen	https://gtexportal.org/home/
		proxy	195760948	rs9861311	TFRC	195779736	rs9861311	rs41298087	0.28	C	-	MIR570	1.4e-05	-0.28	Nerve - Tibial	https://gtexportal.org/home/
		proxy	195760948	rs9861311	TFRC	195779736	rs9861311	rs41298087	0.28	C	-	MUC4	1.5e-05	-0.38	Brain - Caudate (basal ganglia)	https://gtexportal.org/home/
		proxy	195760948	rs9861311	TFRC	195779736	rs9861311	rs41298087	0.28	C	-	SDHAP1	1.6e-05	-0.24	Breast - Mammary Tissue	https://gtexportal.org/home/
		proxy	195760948	rs9861311	TFRC	195779736	rs9861311	rs41298087	0.28	C	-	MUC4	1.6e-05	-0.4	Brain - Putamen (basal ganglia)	https://gtexportal.org/home/
		proxy	195760948	rs9861311	TFRC	195779736	rs9861311	rs41298087	0.28	C	-	TFRC	2.2e-05	-0.15	Lung	https://gtexportal.org/home/
		proxy	195760948	rs9861311	TFRC	195779736	rs9861311	rs41298087	0.28	C	-	MIR570	2.4e-05	-0.28	Lung	https://gtexportal.org/home/
		proxy	195760948	rs9861311	TFRC	195779736	rs9861311	rs41298087	0.28	C	-	SDHAP1	2.4e-05	-0.19	Adipose - Visceral (Omentum)	https://gtexportal.org/home/
		proxy	195760948	rs9861311	TFRC	195779736	rs9861311	rs41298087	0.28	C	-	AC024937.4	2.9e-05	-0.37	Adrenal Gland	https://gtexportal.org/home/
		proxy	195760948	rs9861311	TFRC	195779736	rs9861311	rs41298087	0.28	C	-	RP11-141C7.2	3.7e-05	-0.22	Whole Blood	https://gtexportal.org/home/
		proxy	195760948	rs9861311	TFRC	195779736	rs9861311	rs41298087	0.28	C	-	MUC4	4.6e-05	-0.25	Nerve - Tibial	https://gtexportal.org/home/
		proxy	195760948	rs9861311	TFRC	195779736	rs9861311	rs41298087	0.28	C	-	AC024937.4	5.3e-05	-0.27	Skin - Not Sun Exposed (Suprapubic)	https://gtexportal.org/home/
		proxy	195760948	rs9861311	TFRC	195779736	rs9861311	rs41298087	0.28	C	-	TFRC	5.5e-05	-0.18	Artery - Aorta	https://gtexportal.org/home/
		proxy	195760948	rs9861311	TFRC	195779736	rs9861311	rs41298087	0.28	C	-	AC024937.4	6e-05	-0.26	Adipose - Visceral (Omentum)	https://gtexportal.org/home/
		proxy	195760948	rs9861311	TFRC	195779736	rs9861311	rs41298087	0.28	C	-	SDHAP1	9.2e-05	-0.19	Esophagus - Mucosa	https://gtexportal.org/home/
		proxy	195760948	rs9861311	TFRC	195800547	rs9861311	rs9859260	0.23	C	+	RP11-480A16.1	2.4e-09	0.17	Thyroid	https://gtexportal.org/home/
		proxy	195760948	rs9861311	TFRC	195800547	rs9861311	rs9859260	0.23	C	+	SDHAP1	3.7e-09	0.23	Thyroid	https://gtexportal.org/home/
		proxy	195760948	rs9861311	TFRC	195800547	rs9861311	rs9859260	0.23	C	+	AC024937.4	2.6e-08	0.3	Thyroid	https://gtexportal.org/home/
		proxy	195760948	rs9861311	TFRC	195800547	rs9861311	rs9859260	0.23	C	+	AC024937.6	2.8e-08	0.19	Thyroid	https://gtexportal.org/home/
		proxy	195760948	rs9861311	TFRC	195800547	rs9861311	rs9859260	0.23	C	+	RP11-141C7.2	3.5e-08	0.28	Thyroid	https://gtexportal.org/home/
		proxy	195760948	rs9861311	TFRC	195800547	rs9861311	rs9859260	0.23	C	+	AC024937.4	1.2e-07	0.25	Muscle - Skeletal	https://gtexportal.org/home/
		proxy	195760948	rs9861311	TFRC	195800547	rs9861311	rs9859260	0.23	C	+	MUC4	1.2e-06	0.27	Skin - Sun Exposed (Lower leg)	https://gtexportal.org/home/
		proxy	195760948	rs9861311	TFRC	195800547	rs9861311	rs9859260	0.23	C	+	MUC20	1.6e-06	0.37	Liver	https://gtexportal.org/home/
		proxy	195760948	rs9861311	TFRC	195800547	rs9861311	rs9859260	0.23	C	+	SDHAP1	2.7e-06	0.18	Muscle - Skeletal	https://gtexportal.org/home/
		proxy	195760948	rs9861311	TFRC	195800547	rs9861311	rs9859260	0.23	C	+	AC024937.4	2.9e-06	0.29	Lung	https://gtexportal.org/home/
		proxy	195760948	rs9861311	TFRC	195800547	rs9861311	rs9859260	0.23	C	+	AC024937.4	3e-06	0.42	Liver	https://gtexportal.org/home/
		proxy	195760948	rs9861311	TFRC	195800547	rs9861311	rs9859260	0.23	C	+	RP11-141C7.2	3.4e-06	0.28	Colon - Transverse	https://gtexportal.org/home/
		proxy	195760948	rs9861311	TFRC	195800547	rs9861311	rs9859260	0.23	C	+	AC024937.4	6.1e-06	0.25	Esophagus - Mucosa	https://gtexportal.org/home/
		proxy	195760948	rs9861311	TFRC	195800547	rs9861311	rs9859260	0.23	C	+	MUC4	6.8e-06	0.39	Brain - Putamen (basal ganglia)	https://gtexportal.org/home/
		proxy	195760948	rs9861311	TFRC	195800547	rs9861311	rs9859260	0.23	C	+	MIR570	7.8e-06	0.27	Nerve - Tibial	https://gtexportal.org/home/
		proxy	195760948	rs9861311	TFRC	195800547	rs9861311	rs9859260	0.23	C	+	MUC4	9.7e-06	0.25	Thyroid	https://gtexportal.org/home/
		proxy	195760948	rs9861311	TFRC	195800547	rs9861311	rs9859260	0.23	C	+	RP11-141C7.2	1.1e-05	0.21	Skin - Sun Exposed (Lower leg)	https://gtexportal.org/home/
		proxy	195760948	rs9861311	TFRC	195800547	rs9861311	rs9859260	0.23	C	+	SDHAP1	1.5e-05	0.19	Esophagus - Mucosa	https://gtexportal.org/home/
		proxy	195760948	rs9861311	TFRC	195800547	rs9861311	rs9859260	0.23	C	+	AC024937.4	2.3e-05	0.26	Colon - Transverse	https://gtexportal.org/home/
		proxy	195760948	rs9861311	TFRC	195800547	rs9861311	rs9859260	0.23	C	+	SDHAP1	3.1e-05	0.19	Adipose - Subcutaneous	https://gtexportal.org/home/
		proxy	195760948	rs9861311	TFRC	195800547	rs9861311	rs9859260	0.23	C	+	MIR570	3.1e-05	0.33	Testis	https://gtexportal.org/home/
		proxy	195760948	rs9861311	TFRC	195800547	rs9861311	rs9859260	0.23	C	+	SDHAP1	3.2e-05	0.25	Stomach	https://gtexportal.org/home/
		proxy	195760948	rs9861311	TFRC	195800547	rs9861311	rs9859260	0.23	C	-	TFRC	3.2e-05	-0.26	Spleen	https://gtexportal.org/home/
		proxy	195760948	rs9861311	TFRC	195800547	rs9861311	rs9859260	0.23	C	+	AC024937.4	3.7e-05	0.37	Pituitary	https://gtexportal.org/home/
		proxy	195760948	rs9861311	TFRC	195800547	rs9861311	rs9859260	0.23	C	-	TFRC	3.9e-05	-0.15	Skin - Sun Exposed (Lower leg)	https://gtexportal.org/home/
		proxy	195760948	rs9861311	TFRC	195800547	rs9861311	rs9859260	0.23	C	+	SDHAP1	4e-05	0.25	Pancreas	https://gtexportal.org/home/
		proxy	195760948	rs9861311	TFRC	195800547	rs9861311	rs9859260	0.23	C	+	RP11-141C7.2	4.1e-05	0.2	Whole Blood	https://gtexportal.org/home/
		proxy	195760948	rs9861311	TFRC	195800547	rs9861311	rs9859260	0.23	C	+	MUC4	5e-05	0.23	Nerve - Tibial	https://gtexportal.org/home/
		proxy	195760948	rs9861311	TFRC	195800547	rs9861311	rs9859260	0.23	C	+	SDHAP1	5.5e-05	0.21	Colon - Transverse	https://gtexportal.org/home/
		proxy	195760948	rs9861311	TFRC	195800547	rs9861311	rs9859260	0.23	C	+	AC024937.4	6.1e-05	0.23	Skin - Sun Exposed (Lower leg)	https://gtexportal.org/home/
		proxy	195760948	rs9861311	TFRC	195793339	rs9861311	rs2300775	0.23	T	+	RP11-480A16.1	2.4e-09	0.17	Thyroid	https://gtexportal.org/home/
		proxy	195760948	rs9861311	TFRC	195793339	rs9861311	rs2300775	0.23	T	+	SDHAP1	3.7e-09	0.23	Thyroid	https://gtexportal.org/home/
		proxy	195760948	rs9861311	TFRC	195793339	rs9861311	rs2300775	0.23	T	+	AC024937.4	2.6e-08	0.3	Thyroid	https://gtexportal.org/home/
		proxy	195760948	rs9861311	TFRC	195793339	rs9861311	rs2300775	0.23	T	+	AC024937.6	2.8e-08	0.19	Thyroid	https://gtexportal.org/home/
		proxy	195760948	rs9861311	TFRC	195793339	rs9861311	rs2300775	0.23	T	+	RP11-141C7.2	3.5e-08	0.28	Thyroid	https://gtexportal.org/home/
		proxy	195760948	rs9861311	TFRC	195793339	rs9861311	rs2300775	0.23	T	+	AC024937.4	1.2e-07	0.25	Muscle - Skeletal	https://gtexportal.org/home/
		proxy	195760948	rs9861311	TFRC	195793339	rs9861311	rs2300775	0.23	T	+	MUC4	1.2e-06	0.27	Skin - Sun Exposed (Lower leg)	https://gtexportal.org/home/
		proxy	195760948	rs9861311	TFRC	195793339	rs9861311	rs2300775	0.23	T	+	MUC20	1.6e-06	0.37	Liver	https://gtexportal.org/home/
		proxy	195760948	rs9861311	TFRC	195793339	rs9861311	rs2300775	0.23	T	+	SDHAP1	2.7e-06	0.18	Muscle - Skeletal	https://gtexportal.org/home/
		proxy	195760948	rs9861311	TFRC	195793339	rs9861311	rs2300775	0.23	T	+	AC024937.4	2.9e-06	0.29	Lung	https://gtexportal.org/home/
		proxy	195760948	rs9861311	TFRC	195793339	rs9861311	rs2300775	0.23	T	+	AC024937.4	3e-06	0.42	Liver	https://gtexportal.org/home/
		proxy	195760948	rs9861311	TFRC	195793339	rs9861311	rs2300775	0.23	T	+	RP11-141C7.2	3.4e-06	0.28	Colon - Transverse	https://gtexportal.org/home/
		proxy	195760948	rs9861311	TFRC	195793339	rs9861311	rs2300775	0.23	T	+	AC024937.4	6.1e-06	0.25	Esophagus - Mucosa	https://gtexportal.org/home/
		proxy	195760948	rs9861311	TFRC	195793339	rs9861311	rs2300775	0.23	T	+	MUC4	6.8e-06	0.39	Brain - Putamen (basal ganglia)	https://gtexportal.org/home/
		proxy	195760948	rs9861311	TFRC	195793339	rs9861311	rs2300775	0.23	T	+	MIR570	7.8e-06	0.27	Nerve - Tibial	https://gtexportal.org/home/
		proxy	195760948	rs9861311	TFRC	195793339	rs9861311	rs2300775	0.23	T	+	MUC4	9.7e-06	0.25	Thyroid	https://gtexportal.org/home/
		proxy	195760948	rs9861311	TFRC	195793339	rs9861311	rs2300775	0.23	T	+	RP11-141C7.2	1.1e-05	0.21	Skin - Sun Exposed (Lower leg)	https://gtexportal.org/home/
		proxy	195760948	rs9861311	TFRC	195793339	rs9861311	rs2300775	0.23	T	+	SDHAP1	1.5e-05	0.19	Esophagus - Mucosa	https://gtexportal.org/home/
		proxy	195760948	rs9861311	TFRC	195793339	rs9861311	rs2300775	0.23	T	+	AC024937.4	2.3e-05	0.26	Colon - Transverse	https://gtexportal.org/home/
		proxy	195760948	rs9861311	TFRC	195793339	rs9861311	rs2300775	0.23	T	+	SDHAP1	3.1e-05	0.19	Adipose - Subcutaneous	https://gtexportal.org/home/
		proxy	195760948	rs9861311	TFRC	195793339	rs9861311	rs2300775	0.23	T	+	MIR570	3.1e-05	0.33	Testis	https://gtexportal.org/home/
		proxy	195760948	rs9861311	TFRC	195793339	rs9861311	rs2300775	0.23	T	+	SDHAP1	3.2e-05	0.25	Stomach	https://gtexportal.org/home/
		proxy	195760948	rs9861311	TFRC	195793339	rs9861311	rs2300775	0.23	T	-	TFRC	3.2e-05	-0.26	Spleen	https://gtexportal.org/home/
		proxy	195760948	rs9861311	TFRC	195793339	rs9861311	rs2300775	0.23	T	+	AC024937.4	3.7e-05	0.37	Pituitary	https://gtexportal.org/home/
		proxy	195760948	rs9861311	TFRC	195793339	rs9861311	rs2300775	0.23	T	-	TFRC	3.9e-05	-0.15	Skin - Sun Exposed (Lower leg)	https://gtexportal.org/home/
		proxy	195760948	rs9861311	TFRC	195793339	rs9861311	rs2300775	0.23	T	+	SDHAP1	4e-05	0.25	Pancreas	https://gtexportal.org/home/
		proxy	195760948	rs9861311	TFRC	195793339	rs9861311	rs2300775	0.23	T	+	RP11-141C7.2	4.1e-05	0.2	Whole Blood	https://gtexportal.org/home/
		proxy	195760948	rs9861311	TFRC	195793339	rs9861311	rs2300775	0.23	T	+	MUC4	5e-05	0.23	Nerve - Tibial	https://gtexportal.org/home/
		proxy	195760948	rs9861311	TFRC	195793339	rs9861311	rs2300775	0.23	T	+	SDHAP1	5.5e-05	0.21	Colon - Transverse	https://gtexportal.org/home/
		proxy	195760948	rs9861311	TFRC	195793339	rs9861311	rs2300775	0.23	T	+	AC024937.4	6.1e-05	0.23	Skin - Sun Exposed (Lower leg)	https://gtexportal.org/home/
		proxy	195760948	rs9861311	TFRC	195807625	rs9861311	rs3804139	0.23	T	+	SDHAP1	2.5e-09	0.23	Thyroid	https://gtexportal.org/home/
		proxy	195760948	rs9861311	TFRC	195807625	rs9861311	rs3804139	0.23	T	+	RP11-480A16.1	2.6e-09	0.17	Thyroid	https://gtexportal.org/home/
		proxy	195760948	rs9861311	TFRC	195807625	rs9861311	rs3804139	0.23	T	+	AC024937.6	1.7e-08	0.19	Thyroid	https://gtexportal.org/home/
		proxy	195760948	rs9861311	TFRC	195807625	rs9861311	rs3804139	0.23	T	+	AC024937.4	3e-08	0.3	Thyroid	https://gtexportal.org/home/
		proxy	195760948	rs9861311	TFRC	195807625	rs9861311	rs3804139	0.23	T	+	RP11-141C7.2	3.3e-08	0.28	Thyroid	https://gtexportal.org/home/
		proxy	195760948	rs9861311	TFRC	195807625	rs9861311	rs3804139	0.23	T	+	AC024937.4	1.2e-07	0.25	Muscle - Skeletal	https://gtexportal.org/home/
		proxy	195760948	rs9861311	TFRC	195807625	rs9861311	rs3804139	0.23	T	+	MUC4	1.6e-06	0.26	Skin - Sun Exposed (Lower leg)	https://gtexportal.org/home/
		proxy	195760948	rs9861311	TFRC	195807625	rs9861311	rs3804139	0.23	T	+	MUC20	1.6e-06	0.37	Liver	https://gtexportal.org/home/
		proxy	195760948	rs9861311	TFRC	195807625	rs9861311	rs3804139	0.23	T	+	AC024937.4	2.5e-06	0.29	Lung	https://gtexportal.org/home/
		proxy	195760948	rs9861311	TFRC	195807625	rs9861311	rs3804139	0.23	T	+	AC024937.4	3e-06	0.42	Liver	https://gtexportal.org/home/
		proxy	195760948	rs9861311	TFRC	195807625	rs9861311	rs3804139	0.23	T	+	RP11-141C7.2	3.4e-06	0.28	Colon - Transverse	https://gtexportal.org/home/
		proxy	195760948	rs9861311	TFRC	195807625	rs9861311	rs3804139	0.23	T	+	SDHAP1	3.6e-06	0.18	Muscle - Skeletal	https://gtexportal.org/home/
		proxy	195760948	rs9861311	TFRC	195807625	rs9861311	rs3804139	0.23	T	+	AC024937.4	4.2e-06	0.25	Esophagus - Mucosa	https://gtexportal.org/home/
		proxy	195760948	rs9861311	TFRC	195807625	rs9861311	rs3804139	0.23	T	+	MUC4	6.8e-06	0.39	Brain - Putamen (basal ganglia)	https://gtexportal.org/home/
		proxy	195760948	rs9861311	TFRC	195807625	rs9861311	rs3804139	0.23	T	+	MIR570	7.8e-06	0.27	Nerve - Tibial	https://gtexportal.org/home/
		proxy	195760948	rs9861311	TFRC	195807625	rs9861311	rs3804139	0.23	T	+	SDHAP1	9.8e-06	0.2	Esophagus - Mucosa	https://gtexportal.org/home/
		proxy	195760948	rs9861311	TFRC	195807625	rs9861311	rs3804139	0.23	T	+	RP11-141C7.2	1e-05	0.21	Skin - Sun Exposed (Lower leg)	https://gtexportal.org/home/
		proxy	195760948	rs9861311	TFRC	195807625	rs9861311	rs3804139	0.23	T	+	MUC4	1.2e-05	0.25	Thyroid	https://gtexportal.org/home/
		proxy	195760948	rs9861311	TFRC	195807625	rs9861311	rs3804139	0.23	T	-	TFRC	2.1e-05	-0.27	Spleen	https://gtexportal.org/home/
		proxy	195760948	rs9861311	TFRC	195807625	rs9861311	rs3804139	0.23	T	-	TFRC	2.3e-05	-0.15	Skin - Sun Exposed (Lower leg)	https://gtexportal.org/home/
		proxy	195760948	rs9861311	TFRC	195807625	rs9861311	rs3804139	0.23	T	+	AC024937.4	2.3e-05	0.26	Colon - Transverse	https://gtexportal.org/home/
		proxy	195760948	rs9861311	TFRC	195807625	rs9861311	rs3804139	0.23	T	+	SDHAP1	3e-05	0.26	Pancreas	https://gtexportal.org/home/
		proxy	195760948	rs9861311	TFRC	195807625	rs9861311	rs3804139	0.23	T	+	MIR570	3.1e-05	0.33	Testis	https://gtexportal.org/home/
		proxy	195760948	rs9861311	TFRC	195807625	rs9861311	rs3804139	0.23	T	+	SDHAP1	3.2e-05	0.25	Stomach	https://gtexportal.org/home/
		proxy	195760948	rs9861311	TFRC	195807625	rs9861311	rs3804139	0.23	T	+	SDHAP1	3.6e-05	0.19	Adipose - Subcutaneous	https://gtexportal.org/home/
		proxy	195760948	rs9861311	TFRC	195807625	rs9861311	rs3804139	0.23	T	+	AC024937.4	3.7e-05	0.37	Pituitary	https://gtexportal.org/home/
		proxy	195760948	rs9861311	TFRC	195807625	rs9861311	rs3804139	0.23	T	+	RP11-141C7.2	3.8e-05	0.2	Whole Blood	https://gtexportal.org/home/
		proxy	195760948	rs9861311	TFRC	195807625	rs9861311	rs3804139	0.23	T	+	MUC4	5e-05	0.23	Nerve - Tibial	https://gtexportal.org/home/
		proxy	195760948	rs9861311	TFRC	195807625	rs9861311	rs3804139	0.23	T	+	SDHAP1	5.5e-05	0.21	Colon - Transverse	https://gtexportal.org/home/
		proxy	195760948	rs9861311	TFRC	195807625	rs9861311	rs3804139	0.23	T	+	AC024937.4	7e-05	0.23	Skin - Sun Exposed (Lower leg)	https://gtexportal.org/home/
	19	sentinel	45411941	rs429358	APOE					T	-	APOC1	2.3e-05	-0.28	Esophagus - Mucosa	https://gtexportal.org/home/
		sentinel	45411941	rs429358	APOE					T	+	CTB-129P6.4	4.1e-05	0.3	Esophagus - Muscularis	https://gtexportal.org/home/
		sentinel	45411941	rs429358	APOE					T	-	APOC1	4.8e-05	-0.36	Adrenal Gland	https://gtexportal.org/home/
		sentinel	45411941	rs429358	APOE					T	+	CTB-171A8.1	0.00012	0.3	Thyroid	https://gtexportal.org/home/

## Sheet: Table S9
	Table S9. Comparison of the results between Winkler et al. and current study
	SNP (proxy SNP, r2)	Nearest Locus	Chromosome	Position (hg19)	Allelesa EA/OA	Winkler et al.							Current study
						Age ≤ 50y			Age > 50y		PAgediff		Q1			Q4		Pdiffb
						Beta	P		Beta	P			Beta	P		Beta	P
	rs9936385	FTO	16	52376670	C/T	0.093	4.5e-95		0.073	1e-97	0.00016		0.3883	1.563e-60		0.2683	3.657e-35	4.30818e-05
	rs2867125	TMEM18	2	612827	C/T	0.086	6.1e-49		0.051	2.3e-30	4e-07		0.3155	9.01e-25		0.1514	6.842e-08	1.61224e-05
	rs12955983	MC4R	18	56023969	G/A	0.068	1.7e-41		0.038	2e-23	6.7e-07		0.2432	1.462e-20		0.1876	5.92e-15	0.0870794
	rs6737082 (rs10203386, r2 = 0.84)	ADCY3	2	24991544	C/A (A/T)	0.046	6.3e-20		0.022	5.4e-09	4.7e-05		0.1745	6.351e-14		0.09099	2.013e-05	0.00382925
	rs2821248	NEGR1	1	72348148	A/G	0.042	8.4e-12		0.017	1.9e-44	0.00062		0.1442	2.022e-06		0.08461	0.002366	0.113613
	rs1514174 (rs6690871, r2 = 0.85)	TNNI3K	1	74765651	C/T (G/A)	0.039	3e-15		0.012	0.0017	2.8e-06		0.1251	1.386e-07		0.03941	0.07089	0.00367233
	rs591120	SEC16B	1	176169376	C/G	0.033	4.9e-14		0.014	2.8e-05	0.00031		0.1496	1.1e-10		0.08308	9.628e-05	0.0208956
	rs11908421 (rs6092179, r2 = 0.93)	CBLN4	20	53813074	T/C (C/A)	0.033	8.7e-08		0.007	0.12	0.00043		0.1149	0.0001398		0.02306	0.408	0.0145101
	rs4947644	DDC	7	50586370	T/C	0.03	7.37e-08		0.009	0.017	0.00025		0.07185	0.002057		0.03839	0.07273	0.247635
	rs10840060	STK33	11	8456621	C/A	0.029	3.8e-11		0.011	0.002	0.0004		0.07905	0.0006525		0.03974	0.0624	0.172622
	rs1459180	intergenic	8	77144822	G/T	0.027	3.1e-09		0.009	0.016	0.0006		0.1057	7.522e-06		0.02988	0.1691	0.00979499
	rs17747324	TCF7L2	10	114742493	T/C	0.004	0.48		0.031	2.6e-13	4.7e-05		0.0572	0.04051		0.0591	0.02104	0.956283
	rs3127574	SLC22A3	6	160711360	C/G	0.001	0.79		0.019	2.3e-08	0.00068		0.04905	0.0338		0.03332	0.1177	0.584215
	rs3769885	COBLL1	2	165300636	A/G	-0.001	0.91		0.02	3.9e-09	0.00011		0.0363	0.1165		0.04062	0.05554	0.880416
	rs4420638	APOC1	19	50114786	A/G	-0.007	0.36		0.04	8.9e-12	2.1e-07		0.01299	0.6572		0.1947	7.407e-13	6.46881e-07
	aEffect allele is the BMI increasing allele used in the study of Winkler et al.
	bThe significant P-values that reach the Bonferroni corrected P threshold < 3.33×10-3 are in bold.
	EA, Effect allele; OA, Other allele

## Sheet: Table S10
	Table S10. Association between rs429358 and lipid traits
	SNP	Phenotype		Q1	Q2	Q3	Q4
	rs429358	HDL-C	Beta	-0.0307	-0.0307	-0.0304	-0.0285
			SE	0.0021	0.0022	0.0023	0.0024
			P	3.89e-47	5.44e-43	2e-38	6.9e-33
		LDL-c	Beta	0.1955	0.188	0.1561	0.1276
			SE	0.005082	0.005443	0.005898	0.006111
			P	0	9.19e-260	9.69e-154	1.76e-96
	The P for the effects on phenotypes were assessed by using a Plink v.1.9.0 with adjustment for age, sex, genotyping array and PC1~10.

[truncated: 1 more sheets: Table S11]
